# Supplementary material for: Polymer based silver nanocomposites as versatile solid film and aqueous emulsion SERS substrates
Source: Royal Society of Chemistry journal article supplement (doi:10.1039/c1jm12444g), 2011-01-01
Supplement: c1jm12444g.pdf [file c1jm12444g.pdf]

## Electronic Supplementary Information

### Polymer based silver nanocomposites as versatile solid film and aqueous emulsion SERS substrates

Sara Fateixa, Ana Violeta Girão, Helena I. S. Nogueira, Tito Trindade\*

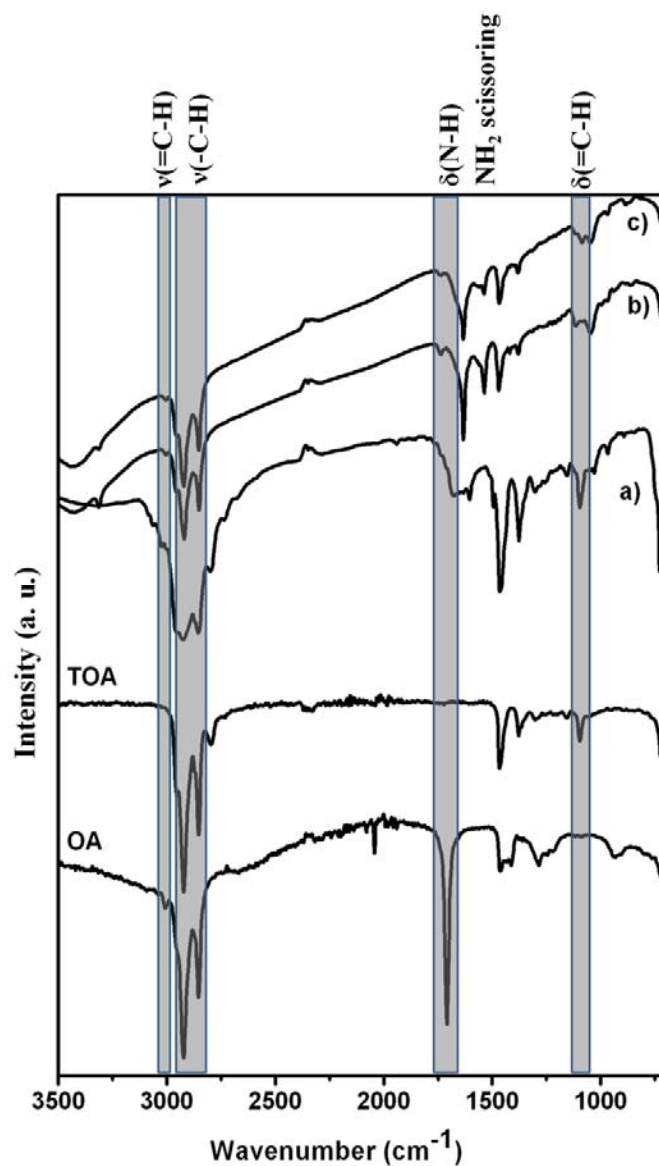

**Figure S1:** FT-IR spectra of organically capped silver nanocrystals; a) Ag/TOA/OA; b) Ag/OA(EG); c) Ag/OA (TOA: trioctylamine; OA: oleylamine).

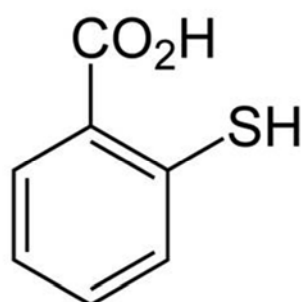

**Figure S2:** Structural formula for thiosalicylic acid (or mercaptobenzoic acid).

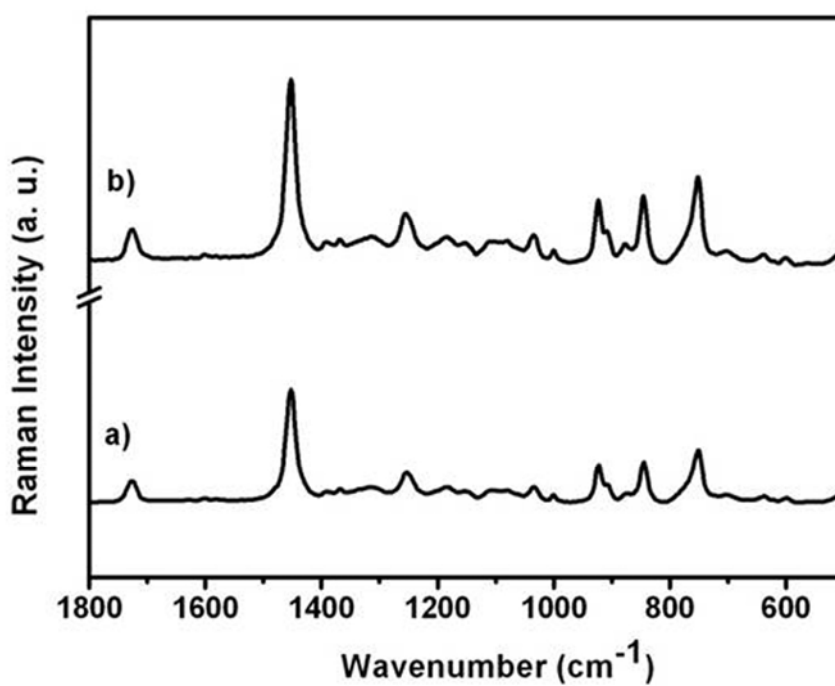

**Figure S3:** a) FT-Raman spectrum of poly(t-butylacrylate) b) FT-Raman spectrum from a drop of thiosalicylic in poly(t-butylacrylate) as substrate.

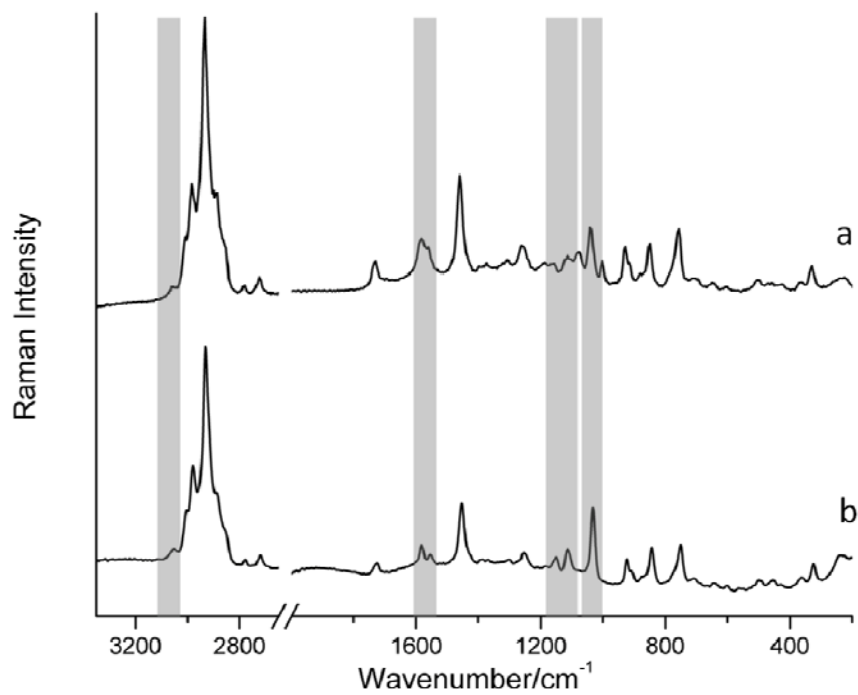

**Figure S4:** Raman spectrum recorded with a 532 nm laser (a) and FT-Raman spectrum recorded with a 1064 nm laser (b) of a thiosalicylic acid aqueous solution ( $10^{-3}$  M) dropped in Ag/PtBA solid film showing the SERS signal of the analyte (shadow regions).

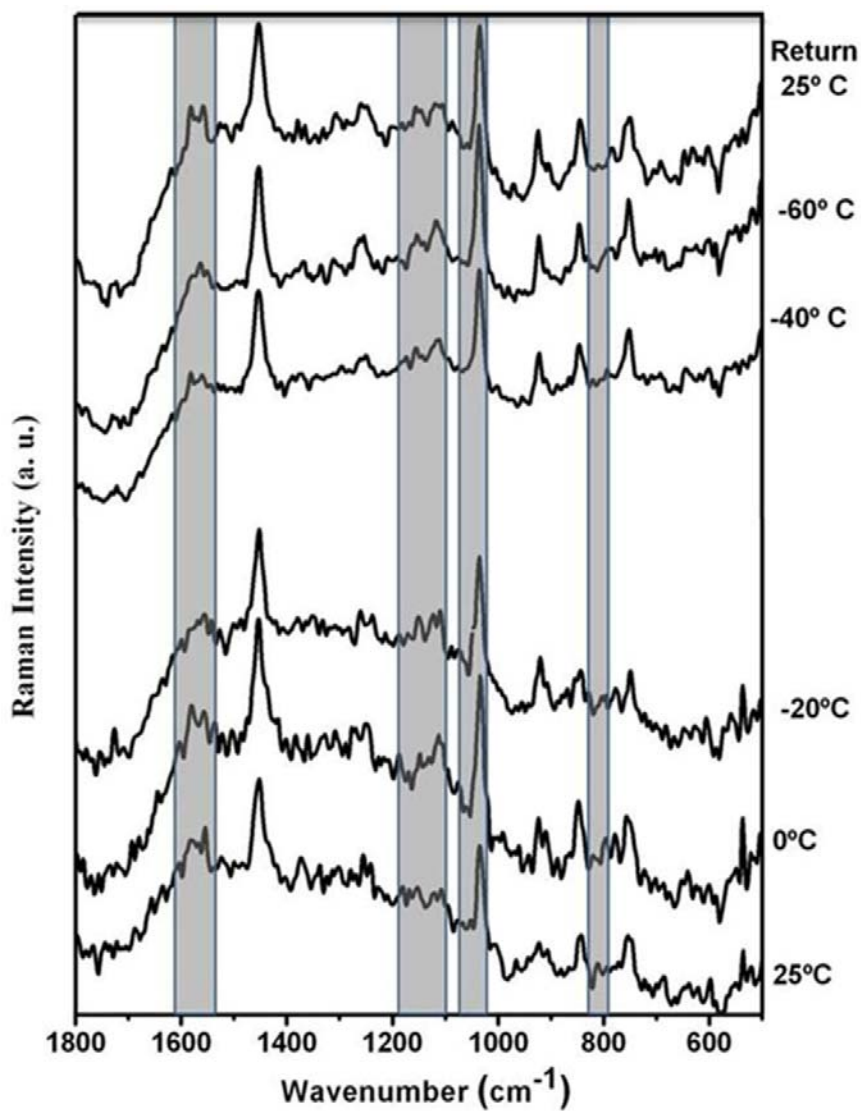

**Figure S5:** SERS spectra for thiosalicylic acid in a Ag/PtBA film recorded at variable temperatures.
